# Supplementary material for: Quantitative Evaluation of the Relationship between T-Wave-Based Features and Serum Potassium Level in Real-World Clinical Practice
Source: PubMed Central journal article supplement (PMC6312577; doi:10.1155/2018/3054316), 2018-12-18
Supplement: 3054316.f2.pdf [file 3054316.f2.pdf]

**Table S1. The detailed interpretation lists of otherwise normal ECG and its count per each interpretation**

| <b>Interpretation</b>                                                  | <b>Count</b> |
|------------------------------------------------------------------------|--------------|
| Sinus bradycardia/Otherwise normal ECG                                 | 29           |
| Sinus rhythm with 1st degree A-V block/Otherwise normal ECG            | 4            |
| Sinus tachycardia/Otherwise normal ECG                                 | 4            |
| Sinus tachycardia with 1st degree A-V block/Otherwise normal ECG       | 1            |
| Sinus bradycardia with 1st degree A-V block/Otherwise normal ECG       | 1            |
| Sinus bradycardia with Premature atrial complexes/Otherwise normal ECG | 1            |
